# Supplementary material for: A novel resistance gene for bacterial blight in rice, Xa43(t) identified by GWAS, confirmed by QTL mapping using a bi-parental population
Source: PubMed Central journal article supplement (PMC6372157; doi:10.1371/journal.pone.0211775), 2019-02-12
Supplement: pone.0211775.s002.pdf [file pone.0211775.s002.pdf]

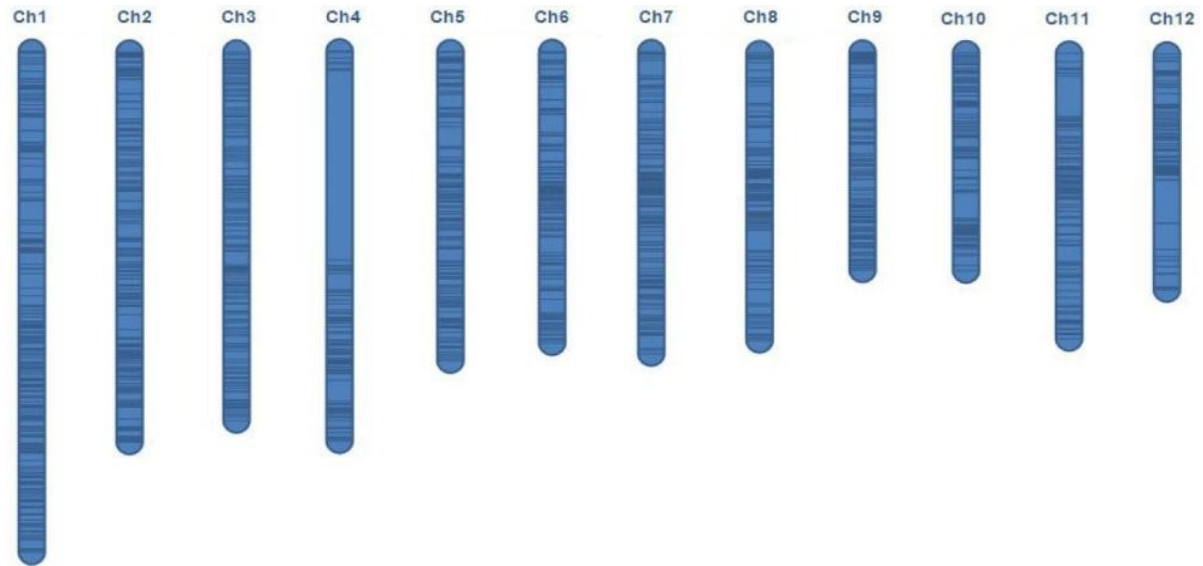

S2 Fig. Genetic linkage map of the 12 chromosome based on 1,596 SNP markers segregating in in the P8/Ilpum 451 F<sub>2</sub> population.
