# Supplementary material for: A novel resistance gene for bacterial blight in rice, Xa43(t) identified by GWAS, confirmed by QTL mapping using a bi-parental population
Source: PubMed Central journal article supplement (PMC6372157; doi:10.1371/journal.pone.0211775), 2019-02-12
Supplement: pone.0211775.s003.pdf [file pone.0211775.s003.pdf]

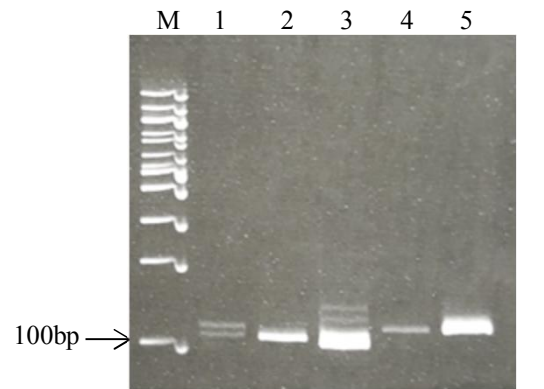

1: P6, 2:P8, 3:IRBB4, 4:Junam, 5:11325

S3 Fig. Comparison of amplicon size derived from five different lines using DNA marker IBb27os11\_14. P6 and P8 are *R*-donor parents out of eight in JMAGIC lines, which showed resistant to BB races. Junam, IRBB4 and 11325 have *Xa3*, *Xa4*, and *Xa40(t)*, respectively. M is 100bp size marker.
