# Supplementary material for: A novel resistance gene for bacterial blight in rice, Xa43(t) identified by GWAS, confirmed by QTL mapping using a bi-parental population
Source: PLoS One. 2019 Feb 12;14(2):e0211775. doi: 10.1371/journal.pone.0211775 (PMC6372157; doi:10.1371/journal.pone.0211775)
Supplement: S1 Table — (XLSX) [file pone.0211775.s004.xlsx]

## Sheet: Sheet1
S1 Table. DNA markers tested for fine mapping
#	Primer name	F	R	Type
1	1127.5/9:IBb01	GTGTGTGCATGCATAGAGGG	AATGGCCTGTTGTTGCATGT	Indel
2	1127.5/9:IBb02	GTGTGTGCATGCATAGAGGG	AATGGCCTGTTGTTGCATGT	Indel
3	1127.5/9:IBb03	TTGCCCCTTCACAGTACACT	TGACATCGCCGTGGTTACT	Indel
4	1127.5/9:IBb04	AAGGAGATGGCGTTGGAGAA	TCTTCATCGTCCCAACCCTC	Indel
5	1127.5/9:IBb05	AATACACACGATGGCATGGC	GCGCGACACACATAAGGAAT	Indel
6	1127.5/9:IBb06	TCCTCTTCCTACCACACTATGA	CGCAGGGGACATAACTAGCT	Indel
7	1127.5/9:IBb07	ATTAAAGGATGCGGGCGAAG	CGGGTGTGCAGATGAATCAT	Indel
8	1127.5/9:IBb08	AGTACGCGTGTGTTGTGTTC	GTTCGTATGTGGATAGCGCA	Indel
9	1127.5/9:IBb09	GGTTTCCTGCTAGTGATCGC	GTTCGTATGTGGATAGCGCA	Indel
10	1127.5/9:IBb10	GGTTTCCTGCTAGTGATCGC	GTTCGTATGTGGATAGCGCA	Indel
11	1127.5/9:IBb11	GCTTTTCTCGATCTTGACGCA	GTTCGTATGTGGATAGCGCA	Indel
12	1127.5/9:IBb12	ACCAACCACTACTCTGTTTTCT	TCCATTTCAAAACATAGGGCGT	Indel
13	1127.5/9:IBb13	GCACTAAAATAGAATATGCGGCA	GCCCCACAAATACACTCTTACT	Indel
14	1127.5/9:IBb14	AACCCTGGACTAATTCGCGA	GACGATCCAGGGGCTAAACT	Indel
15	1127.5/9:IBb15	CTTTTGCCGGTGGACTTGAA	TCAACGTCGAGCAACTCAAC	Indel
16	1127.5/9:IBb16	CTTTTGCCGGTGGACTTGAA	TCAACGTCGAGCAACTCAAC	Indel
17	1127.5/9:IBb17	CTGGTGATGAGCTTGTTGGC	TGGTCATCTTCCTTCCATGCA	Indel
18	1127.5/9:IBb18	CTTTGACGATTGACCCATGAGA	TGATTCTGAAGTTGATGCATTGG	Indel
19	1127.5/9:IBb19	GCGCGTGATTAACCGAAGAT	TGGAAGTATGTACGACGGGG	Indel
20	1127.5/9:IBb20	CATCGTTTGGAGGAGGGGT	GCCGAACTTGCCTAAAAGCT	Indel
21	1127.5/9:IBb21	TGCTAGGGGAAGTAACTCTAAGA	CTCATGTGGGAGTATGCAAGT	Indel
22	1127.5/9:IBb22	CATACTTGCATACTCCCACATGA	AGGCCGGTAGTGTTATCAGT	Indel
23	1127.5/9:IBb23	CGACTCGTGCCAATTAACTTAA	TTACAGCCCGTCGTCATCTT	Indel
24	1127.5/9:IBb24	GGCCCACCTATCAACTTCTCT	CGACCGATTCTTCCTCCCTG	Indel
25	1127.5/9:IBb25	TGTGCTTGAAAGTGGTGCTC	TTTTAGATCCAGGGCAAGGG	Indel
26	1127.5/9:IBb26	TACTGGTGGCTAGGACATGG	AACGTTGGTCTCATGGTATGT	Indel
27	1127.5/9:IBb27	CCGATGCTGCCAAATAGACC	TCACTTGGAAGCTCAGGTCT	Indel
28	1127.5/9:IBb28	CCCGAGCAACAGAGGATGG	CCCCATCCGCTGCTACTT	Indel
29	1127.5/9:IBb29	TGCTGACTAGACGAGCACTT	GTCCCTAAATATTTGACGCCGT	Indel
30	1127.5/9:IBb15-1	AGTAGCCGGCCGATTGATTA	TCAACGTCGAGCAACTCAAC	Indel
31	1127.5/9:IBb18-1	ATCTGCTCATCGTTTCCCCT	AGCTTGTACCCTCTAGTGCTG	Indel
32	1127.5/9:IBb22-1	ACTAGAGCGTGGGTGTATGT	CATACTTGCATACTCCCACATGA	Indel
33	1127.5/9:IBb24-1	GGCCCACCTATCAACTTCTCT	CCGCTGACAGGTTCCACT	Indel
34	1127.5/9:IBb25-1	ACTAGATGAGCGTGCTGGAG	AGACATTTGCAGCTGGTGTG	Indel
35	1127.5/9:IBb15-2	CTTTTGCCGGTGGACTTGAA	CAAATAGCGGGACATCAACGT	Indel
36	1127.5/9:IBb18-2	CTTTGACGATTGACCCATGAGA	TTGATCCACTAGCTTGTACCC	Indel
37	1127.5/9:IBb24-2	GCATACACGTGGCAGTCC	TTCTTCCTCCCTGCCGCTT	Indel
38	1127.5/9:IBb25-2	GACGGCGCGGTTGTTCTA	AAAGTGGTGCTCTTCTTCGG	Indel
39	I_Bb11.2780_1	CACACCCTCCCTCTCTATTTATAC	GCGGAGATATTGTGTGCGTA	Indel
40	I_Bb11.2780_1_2	CACACCCTCCCTCTCTATTTATAC	ATTGTGTGCGTATGGGATGC	Indel
41	I_Bb11.2780_2	GCTATGCACCTTCCAATTGTC	GAGGTGATGTATCTTCTACCTCCTCT	Indel
42	I_Bb11.2780_3	GCTATGCACCTTCCAATTGTC	TGATGTATCTTCTACCTCCTCTAGGC	Indel
43	C_Bb11g45930_1	CTTTGGGGGCAATATCAGTG	TGCACAGCTCAGTGAGACCT	Caps marker
44	C_Bb11g45930_2	CTTTGGGGGCAATATCAGTG	GCTGATGAAATGCACAGCTC	Caps marker
45	I_Bb11.2782(88)_1	ACGGGACCAGATGCCTTT	GCATGAAATCGTCGGCATA	Indel
46	I_Bb11.2782(88)_2	GCCGGCTTCTCGTAGGTT	TGCTCCTGCCAAAGAAGC	Indel
47	I_Bb11.2782(88)_3	AGATCCATGCCCCAACCT	CCATGGGTACGCCATCAA	Indel
48	I_Bb11.2782(88)_4	CCAACATTAATTGCTGACCTTG	TTGCTGCAAATCGTCCAA	Indel
49	I_Bb11.2782(88)_5	GACGTAGTCGCGGTGCTT	AAACGCCACGATGGAGAG	Indel
50	I_Bb11.2782(88)_6	GAAGACAACTTTAGTCTCGGTTGAG	AAGCAAAGGTAGCTTGATGTATTTG	Indel
51	I_Bb11.2782(88)_7	AGTCCCAGGACTAAAGAAGAAGAAG	TGATTTTTGGATGATTTTATGAATG	Indel
52	I_Bb11.2782(88)_8	TGGTTCCCAGCCACACTT	CTTGAGATGGCACGGACA	Indel
53	I_Bb11.2782(88)_9	ATCATCTGTAGGGGCAATCG	TTTTATTTGCATGCCCCTGT	Indel
54	I_Bb11.2782(88)_10	CAATCGGACGGCTTATGTTT	CGGTTTGCAACCCCTTATAG	Indel
55	RM27290	ACGTGCTTCGTTTCTCTTTGACG	CGAACTGTGGACTTCTCACTTGTCC	SSR
56	RM27291	CCAGCAGCAGTTCCTGTTCACC	GTATCACGTATGCGCGAGAGAAGG	SSR
57	RM27296	GGGTCTTTGTACACATTCTTGTGG	CTTGAAGGATGAGCAGTATCTCG	SSR
58	STS11049	ATGTGCCAAGGATGAGCAG	CAGAGGTTTGTGAAAAGAATGC	STS
59	STS11065	CGAAGCAAGATCAGGACACA	ACTCTTGTCCGGAAAGCTGA	STS
60	STS11066	TCATGCTGTTGGTTCCACAT	AGTTGGCTTTGTTTGGGTTG	STS
61	S_BB11.ssr_1	CTACCGGCTTTCTCGTCTTG	CGTCCACCTCCTTCTCCAT	SSR
62	S_BB11.ssr_2	TTTTTCCTGTCAACCAAGCA	GGGGATCCCATGATTTAGATG	SSR
63	S_BB11.ssr_3	ATATTTCGCGTTTCCCTCCT	AGATGGCGCACCAATAAAAG	SSR
64	S_BB11.ssr_4	ATATTTCGCGTTTCCCTCCT	TTTGTTGGCGTGGACAGTTA	SSR
65	S_BB11.ssr_5	ATTGATGGCTCCCATTTTCA	ATGGCGCACCAATAAAAGAG	SSR
66	S_BB11.ssr_6	CTTTTATTGGTGCGCCATCT	GAAAAGCGGAGCGTTACAAA	SSR
67	S_BB11.ssr_7	TAACTGTCCACGCCAACAAA	GAAAAGCGGAGCGTTACAAA	SSR
68	S_BB11.ssr_8	GCAACTGGATCATATCATTGAA	AATTAATGAACCGCCTCGTC	SSR
69	S_BB11.ssr_9	GGATCATATCATTGAATTTCCAAC	TCACGAAGCGTTCGAACTAA	SSR
70	IBb27.48-56_1	CAACCCAAAAATGCCAACTT	GCTGCCGAATTGTGAGAAAT	Indel
71	IBb27.48-56_2	ACAAACTCCTTTGGCTGCAT	GCTGCCGAATTGTGAGAAAT	Indel
72	IBb27.48-56_3	GGGCTTCTCTACCTCCTTGG	CACAAACCAAAAAGGGGAGTT	Indel
73	IBb27.48-56_4	CCATTGTTGCAATTTGCTTG	TGCTTGGGGAAGAGAAAAGA	Indel
74	IBb27.48-56_5	TGAACCATATCGACGAGTGC	CCCTTTTGTACGAAACGAGAA	Indel
75	IBb27.48-56_6	TATAGGCAGCAGTTGCACGA	CCCTTTTGTACGAAACGAGAA	Indel
76	IBb27.48-56_7	TCATGAGATATACCGGACGAAA	ACCAACCAGCACTTCTCAGC	Indel
77	IBb27.48-56_8	TCATGAGATATACCGGACGAAA	TCATATGGCATCATGCGTTC	Indel
78	IBb27.48-56_9	AAGGCATAAATGCAAGAACTCA	GCTCCGATCGAGCTGTTATT	Indel
79	IBb27os11_1	ACTGTCTCCACACGCCACGA	GGCCATCCGATTCGTCTTTG	STS
80	IBb27os11_2	CCGATGGTGACCCACTCCTC	GTCGTCGTCGAGCCCAGACT	STS
81	IBb27os11_3	ACGACGACGGCTTGCTCTTC	GGCGGCCATAATGTGACCTG	STS
82	IBb27os11_4	CCTGCCCAGTGGAATTGTCC	TCCCGGAGATTGCTCAGCTC	STS
83	IBb27os11_5	TGGCTGGAGCAGTGTGTCCT	TCCAAGCTGCCCAATCCAAT	STS
84	IBb27os11_6	TGCCGGTGCTATCCTCATCA	TCGGACAATTGCCTTCTTTGG	STS
85	IBb27os11_7	TCGTCGAACCTTGTCAGCAAA	TCGATGACAGCGGTGAGGTT	STS
86	IBb27os11_8	CCCAGAGATTCATCGCGACA	TTCGCCAGCATGGACAGAAA	STS
87	IBb27os11_9	TGGGATGGATCAATGGAGCA	TCTGGGTCCGCCCACATATT	STS
88	IBb27os11_10	GCGACTTCTGCGTCCCTCAT	GCGAGCGTGGTCTTGCCTAT	STS
89	IBb27os11_11	GGCTGAAGCAGCGGTTATGG	GAACATGGCATGGCGTTTGA	STS
90	IBb27os11_12	ACCGGGTTGGCAGTTTTACG	TGAGGATAGCACCGGCATTG	STS
91	IBb27os11_13	GAACATGGCATGGCGTTTGA	GGCTGAAGCAGCGGTTATGG	STS
92	IBb27os11_14	GAGCGGGCTAGCCTACGTCA	ATCACCATCGCCGGAGTCAT	STS
93	IBb27os11_15	TAGACTCCGGCGGCTACGAG	ACCTCGCCGGTGTAGAGCAC	STS
94	IBb27os11_16	CCCACGAGCTCAGACGAACA	TCGAGCACAGCGACAAGGTC	STS
95	IBb27os11_17	CGCCTTCATCAACGACGAGA	ACCTCGCCAGCAGCTTCATC	STS
96	IBb27os11_18	TCGACCTTGTCGCTGTGCTC	TGAGCTGTCGAATGGCGAAC	STS
97	IBb27Los11_1	ATGACGGTGGGATGGTTTGG	ACTAGTGCGAGCCGGAGACG	STS
98	IBb27Los11_2	GTGGTCGCGGTGCTCCTACT	GATGGGCCTCGGATCAACAC	STS
99	IBb27Los11_3	CAAGGAGCTGGCCAGGAAGA	TTGACCGCTTGCACTTTGGA	STS
100	IBb27Los11_4	AGAGGTCACATCCCCCACCA	AAGGTTTGTGGTGCCGTCGT	STS
101	IBb27Los11_5	CTGAGCAGGGGACTGGCCTA	CCTCCTCCACCATGCTCACC	STS
102	IBb27Los11_6	GAATAGGGCAGGGGGAGGTG	GGCATCGAGAAGGACGAGGA	STS
103	IBb27Los11_7	TCGAGGACTGCATCGACGAC	TCTTGAGCTCCGCGATGTTG	STS
104	IBb27Los11_8	AAGAGGCCACCACGTCAACC	TGGGCCCCTTGACCTCTTTC	STS
105	IBb27Los11_9	TGGATTTGAGCAGCGGGACT	TGGGGTTCTTTCGCAAAACAGT	STS
106	IBb27Los11_10	ATCAGGTTACGCGCCAAGGA	CAGGCGAGGAGGGTCGTAGA	STS
107	IBb27Los11_11	GAAGCCGCACTGAGGCACTT	TGTCGTTGGAAGCCGCAGTA	STS
108	IBb27Los11_12	TCCACCGACCCCTCATCTTC	CAGCAGCGTACGTGGAGGAA	STS
109	IBb27Los11_13	ACCGCCGTTAACGAACGAGA	CGTTCTCGCGGCAACGTA	STS
110	IBb27Los11_14	CGACGTTGCGGATGATCTTG	TGCTCGCAACCTGGGTACAA	STS
