# Supplementary material for: A novel resistance gene for bacterial blight in rice, Xa43(t) identified by GWAS, confirmed by QTL mapping using a bi-parental population
Source: PLoS One. 2019 Feb 12;14(2):e0211775. doi: 10.1371/journal.pone.0211775 (PMC6372157; doi:10.1371/journal.pone.0211775)
Supplement: S2 Table — (XLSX) [file pone.0211775.s005.xlsx]

## Sheet: Sheet1
S2 Table. GWAS of resistance to BB isolate HB1009 using GAPIT
SNP	Chromosome	Position	P.value	maf	nobs	Rsquare.of.Model.without.SNP	Rsquare.of.Model.with.SNP	FDR_Adjusted_P-values
11992907	11	28739518	5.74e-05	0.394958	119	0.325403	0.430375	0.123953
11943779	11	27560949	6.28e-05	0.298319	119	0.325403	0.428987	0.123953
12707111	12	17066946	0.002538	0.063025	119	0.325403	0.381315	1
2610698	3	5604156	0.004957	0.436975	119	0.325403	0.373578	1
1329596	1	41917762	0.0052	0.348739	119	0.325403	0.373032	1
11964077	11	27998933	0.005279	0.268908	119	0.325403	0.37286	1
1176444	1	36262201	0.005641	0.084034	119	0.325403	0.372106	1
6766627	6	24873284	0.010496	0.07563	119	0.325403	0.365124	1
4198779	4	14609247	0.010872	0.07563	119	0.325403	0.364734	1
11641947	11	21084315	0.011082	0.491597	119	0.325403	0.364522	1
4226350	4	15852364	0.012161	0.058824	119	0.325403	0.363494	1
9361710	9	7338273	0.014975	0.441176	119	0.325403	0.361207	1
id6011429	6	21952273	0.01639	0.109244	119	0.325403	0.360222	1
id8003624	8	11875479	0.018486	0.487395	119	0.325403	0.358915	1
7047111	7	3421625	0.018506	0.042017	119	0.325403	0.358903	1
c6p9862822	6	9862823	0.018618	0.147059	119	0.325403	0.358838	1
10944235	11	4448674	0.019702	0.012605	119	0.325403	0.358226	1
4189894	4	14322646	0.020918	0.063025	119	0.325403	0.357581	1
8003351	8	778672	0.021623	0.495798	119	0.325403	0.357224	1
