# Supplementary material for: A novel resistance gene for bacterial blight in rice, Xa43(t) identified by GWAS, confirmed by QTL mapping using a bi-parental population
Source: PLoS One. 2019 Feb 12;14(2):e0211775. doi: 10.1371/journal.pone.0211775 (PMC6372157; doi:10.1371/journal.pone.0211775)
Supplement: S3 Table — Green cells show concordance and the violet cells reflect discordance between phenotypic and genotypic data. (XLSX) [file pone.0211775.s006.xlsx]

## Sheet: Sheet1
S3 Table. Comparision of genotypic and phenotypic data of 20 recombinants within the target region. The green cells are concordance and the violet cells reflect discordance between the phenotypic and genotypic data
Plant no.	Lines	Reaction	1127.5/9:IBb01	1127.5/9:IBb17	C_Bb11g45930_2	I_Bb11.2782(88)_1	I_Bb11.2782(88)_2	IBb27os11_14	I_Bb11.2782(88)_6	IBb27Los11_8	S_BB11.ssr_9	STS11066	STS11065
1	7-16	R	1a	1	1	1	1	1	1	1	1	3	2
2	4-18	S	2	2	2	2	2	2	2	2	2	3	1
3	9-14	S	3	3	3	3	3	2	2	2	2	2	1
4	14-1	S	2	2	2	2	2	2	2	2	2	1	1
5	14-3	S	2	2	2	2	2	2	2	2	2	1	1
6	15-20	S	2	2	2	2	2	2	2	2	2	1	3
7	16-4	S	2	2	2	2	2	2	2	2	2	1	3
8	18-2	S	2	2	2	2	2	2	2	2	2	1	3
9	18-4	S	2	2	2	2	2	2	2	2	2	3	3
10	18-18	S	2	2	2	2	2	2	2	2	2	1	3
11	19-17	S	2	2	2	2	2	2	2	2	2	1	3
12	22-15	S	2	2	2	2	2	2	2	2	2	1	3
13	24-15	S	2	2	2	2	2	2	2	2	2	3	1
14	25-2	S	2	2	2	2	2	2	2	2	2	3	3
15	25-4	S	2	2	2	3	1	3	2	2	3	3	1
16	25-5	S	2	2	2	2	2	2	2	2	2	3	1
17	26-6	S	2	2	2	2	2	2	2	2	2	3	1
18	28-3	S	2	2	2	2	2	2	2	2	2	1	3
19	40-2	S	2	2	2	2	2	2	2	2	2	1	3
20	40-5	S	3	3	3	3	3	2	2	2	2	2	2
Number of recombinat issue			2	2	2	3	3	1	0	0	1	18	19
a1 : P8 allele
2: Ilpum allele
3: Hetero type
