# Supplementary material for: A novel resistance gene for bacterial blight in rice, Xa43(t) identified by GWAS, confirmed by QTL mapping using a bi-parental population
Source: PLoS One. 2019 Feb 12;14(2):e0211775. doi: 10.1371/journal.pone.0211775 (PMC6372157; doi:10.1371/journal.pone.0211775)
Supplement: S4 Table — Gene locus has transcript evidence or protein homologs and predicted locus consists of predicted genes without any transcript evidence. (XLSX) [file pone.0211775.s007.xlsx]

## Sheet: S1 Table
S1 Table. DNA markers tested for fine mapping
#	Primer name	F	R	Type
1	1127.5/9:IBb01	GTGTGTGCATGCATAGAGGG	AATGGCCTGTTGTTGCATGT	Indel
2	1127.5/9:IBb02	GTGTGTGCATGCATAGAGGG	AATGGCCTGTTGTTGCATGT	Indel
3	1127.5/9:IBb03	TTGCCCCTTCACAGTACACT	TGACATCGCCGTGGTTACT	Indel
4	1127.5/9:IBb04	AAGGAGATGGCGTTGGAGAA	TCTTCATCGTCCCAACCCTC	Indel
5	1127.5/9:IBb05	AATACACACGATGGCATGGC	GCGCGACACACATAAGGAAT	Indel
6	1127.5/9:IBb06	TCCTCTTCCTACCACACTATGA	CGCAGGGGACATAACTAGCT	Indel
7	1127.5/9:IBb07	ATTAAAGGATGCGGGCGAAG	CGGGTGTGCAGATGAATCAT	Indel
8	1127.5/9:IBb08	AGTACGCGTGTGTTGTGTTC	GTTCGTATGTGGATAGCGCA	Indel
9	1127.5/9:IBb09	GGTTTCCTGCTAGTGATCGC	GTTCGTATGTGGATAGCGCA	Indel
10	1127.5/9:IBb10	GGTTTCCTGCTAGTGATCGC	GTTCGTATGTGGATAGCGCA	Indel
11	1127.5/9:IBb11	GCTTTTCTCGATCTTGACGCA	GTTCGTATGTGGATAGCGCA	Indel
12	1127.5/9:IBb12	ACCAACCACTACTCTGTTTTCT	TCCATTTCAAAACATAGGGCGT	Indel
13	1127.5/9:IBb13	GCACTAAAATAGAATATGCGGCA	GCCCCACAAATACACTCTTACT	Indel
14	1127.5/9:IBb14	AACCCTGGACTAATTCGCGA	GACGATCCAGGGGCTAAACT	Indel
15	1127.5/9:IBb15	CTTTTGCCGGTGGACTTGAA	TCAACGTCGAGCAACTCAAC	Indel
16	1127.5/9:IBb16	CTTTTGCCGGTGGACTTGAA	TCAACGTCGAGCAACTCAAC	Indel
17	1127.5/9:IBb17	CTGGTGATGAGCTTGTTGGC	TGGTCATCTTCCTTCCATGCA	Indel
18	1127.5/9:IBb18	CTTTGACGATTGACCCATGAGA	TGATTCTGAAGTTGATGCATTGG	Indel
19	1127.5/9:IBb19	GCGCGTGATTAACCGAAGAT	TGGAAGTATGTACGACGGGG	Indel
20	1127.5/9:IBb20	CATCGTTTGGAGGAGGGGT	GCCGAACTTGCCTAAAAGCT	Indel
21	1127.5/9:IBb21	TGCTAGGGGAAGTAACTCTAAGA	CTCATGTGGGAGTATGCAAGT	Indel
22	1127.5/9:IBb22	CATACTTGCATACTCCCACATGA	AGGCCGGTAGTGTTATCAGT	Indel
23	1127.5/9:IBb23	CGACTCGTGCCAATTAACTTAA	TTACAGCCCGTCGTCATCTT	Indel
24	1127.5/9:IBb24	GGCCCACCTATCAACTTCTCT	CGACCGATTCTTCCTCCCTG	Indel
25	1127.5/9:IBb25	TGTGCTTGAAAGTGGTGCTC	TTTTAGATCCAGGGCAAGGG	Indel
26	1127.5/9:IBb26	TACTGGTGGCTAGGACATGG	AACGTTGGTCTCATGGTATGT	Indel
27	1127.5/9:IBb27	CCGATGCTGCCAAATAGACC	TCACTTGGAAGCTCAGGTCT	Indel
28	1127.5/9:IBb28	CCCGAGCAACAGAGGATGG	CCCCATCCGCTGCTACTT	Indel
29	1127.5/9:IBb29	TGCTGACTAGACGAGCACTT	GTCCCTAAATATTTGACGCCGT	Indel
30	1127.5/9:IBb15-1	AGTAGCCGGCCGATTGATTA	TCAACGTCGAGCAACTCAAC	Indel
31	1127.5/9:IBb18-1	ATCTGCTCATCGTTTCCCCT	AGCTTGTACCCTCTAGTGCTG	Indel
32	1127.5/9:IBb22-1	ACTAGAGCGTGGGTGTATGT	CATACTTGCATACTCCCACATGA	Indel
33	1127.5/9:IBb24-1	GGCCCACCTATCAACTTCTCT	CCGCTGACAGGTTCCACT	Indel
34	1127.5/9:IBb25-1	ACTAGATGAGCGTGCTGGAG	AGACATTTGCAGCTGGTGTG	Indel
35	1127.5/9:IBb15-2	CTTTTGCCGGTGGACTTGAA	CAAATAGCGGGACATCAACGT	Indel
36	1127.5/9:IBb18-2	CTTTGACGATTGACCCATGAGA	TTGATCCACTAGCTTGTACCC	Indel
37	1127.5/9:IBb24-2	GCATACACGTGGCAGTCC	TTCTTCCTCCCTGCCGCTT	Indel
38	1127.5/9:IBb25-2	GACGGCGCGGTTGTTCTA	AAAGTGGTGCTCTTCTTCGG	Indel
39	I_Bb11.2780_1	CACACCCTCCCTCTCTATTTATAC	GCGGAGATATTGTGTGCGTA	Indel
40	I_Bb11.2780_1_2	CACACCCTCCCTCTCTATTTATAC	ATTGTGTGCGTATGGGATGC	Indel
41	I_Bb11.2780_2	GCTATGCACCTTCCAATTGTC	GAGGTGATGTATCTTCTACCTCCTCT	Indel
42	I_Bb11.2780_3	GCTATGCACCTTCCAATTGTC	TGATGTATCTTCTACCTCCTCTAGGC	Indel
43	C_Bb11g45930_1	CTTTGGGGGCAATATCAGTG	TGCACAGCTCAGTGAGACCT	Caps marker
44	C_Bb11g45930_2	CTTTGGGGGCAATATCAGTG	GCTGATGAAATGCACAGCTC	Caps marker
45	I_Bb11.2782(88)_1	ACGGGACCAGATGCCTTT	GCATGAAATCGTCGGCATA	Indel
46	I_Bb11.2782(88)_2	GCCGGCTTCTCGTAGGTT	TGCTCCTGCCAAAGAAGC	Indel
47	I_Bb11.2782(88)_3	AGATCCATGCCCCAACCT	CCATGGGTACGCCATCAA	Indel
48	I_Bb11.2782(88)_4	CCAACATTAATTGCTGACCTTG	TTGCTGCAAATCGTCCAA	Indel
49	I_Bb11.2782(88)_5	GACGTAGTCGCGGTGCTT	AAACGCCACGATGGAGAG	Indel
50	I_Bb11.2782(88)_6	GAAGACAACTTTAGTCTCGGTTGAG	AAGCAAAGGTAGCTTGATGTATTTG	Indel
51	I_Bb11.2782(88)_7	AGTCCCAGGACTAAAGAAGAAGAAG	TGATTTTTGGATGATTTTATGAATG	Indel
52	I_Bb11.2782(88)_8	TGGTTCCCAGCCACACTT	CTTGAGATGGCACGGACA	Indel
53	I_Bb11.2782(88)_9	ATCATCTGTAGGGGCAATCG	TTTTATTTGCATGCCCCTGT	Indel
54	I_Bb11.2782(88)_10	CAATCGGACGGCTTATGTTT	CGGTTTGCAACCCCTTATAG	Indel
55	RM27290	ACGTGCTTCGTTTCTCTTTGACG	CGAACTGTGGACTTCTCACTTGTCC	SSR
56	RM27291	CCAGCAGCAGTTCCTGTTCACC	GTATCACGTATGCGCGAGAGAAGG	SSR
57	RM27296	GGGTCTTTGTACACATTCTTGTGG	CTTGAAGGATGAGCAGTATCTCG	SSR
58	STS11049	ATGTGCCAAGGATGAGCAG	CAGAGGTTTGTGAAAAGAATGC	STS
59	STS11065	CGAAGCAAGATCAGGACACA	ACTCTTGTCCGGAAAGCTGA	STS
60	STS11066	TCATGCTGTTGGTTCCACAT	AGTTGGCTTTGTTTGGGTTG	STS
61	S_BB11.ssr_1	CTACCGGCTTTCTCGTCTTG	CGTCCACCTCCTTCTCCAT	SSR
62	S_BB11.ssr_2	TTTTTCCTGTCAACCAAGCA	GGGGATCCCATGATTTAGATG	SSR
63	S_BB11.ssr_3	ATATTTCGCGTTTCCCTCCT	AGATGGCGCACCAATAAAAG	SSR
64	S_BB11.ssr_4	ATATTTCGCGTTTCCCTCCT	TTTGTTGGCGTGGACAGTTA	SSR
65	S_BB11.ssr_5	ATTGATGGCTCCCATTTTCA	ATGGCGCACCAATAAAAGAG	SSR
66	S_BB11.ssr_6	CTTTTATTGGTGCGCCATCT	GAAAAGCGGAGCGTTACAAA	SSR
67	S_BB11.ssr_7	TAACTGTCCACGCCAACAAA	GAAAAGCGGAGCGTTACAAA	SSR
68	S_BB11.ssr_8	GCAACTGGATCATATCATTGAA	AATTAATGAACCGCCTCGTC	SSR
69	S_BB11.ssr_9	GGATCATATCATTGAATTTCCAAC	TCACGAAGCGTTCGAACTAA	SSR
70	IBb27.48-56_1	CAACCCAAAAATGCCAACTT	GCTGCCGAATTGTGAGAAAT	Indel
71	IBb27.48-56_2	ACAAACTCCTTTGGCTGCAT	GCTGCCGAATTGTGAGAAAT	Indel
72	IBb27.48-56_3	GGGCTTCTCTACCTCCTTGG	CACAAACCAAAAAGGGGAGTT	Indel
73	IBb27.48-56_4	CCATTGTTGCAATTTGCTTG	TGCTTGGGGAAGAGAAAAGA	Indel
74	IBb27.48-56_5	TGAACCATATCGACGAGTGC	CCCTTTTGTACGAAACGAGAA	Indel
75	IBb27.48-56_6	TATAGGCAGCAGTTGCACGA	CCCTTTTGTACGAAACGAGAA	Indel
76	IBb27.48-56_7	TCATGAGATATACCGGACGAAA	ACCAACCAGCACTTCTCAGC	Indel
77	IBb27.48-56_8	TCATGAGATATACCGGACGAAA	TCATATGGCATCATGCGTTC	Indel
78	IBb27.48-56_9	AAGGCATAAATGCAAGAACTCA	GCTCCGATCGAGCTGTTATT	Indel
79	IBb27os11_1	ACTGTCTCCACACGCCACGA	GGCCATCCGATTCGTCTTTG	STS
80	IBb27os11_2	CCGATGGTGACCCACTCCTC	GTCGTCGTCGAGCCCAGACT	STS
81	IBb27os11_3	ACGACGACGGCTTGCTCTTC	GGCGGCCATAATGTGACCTG	STS
82	IBb27os11_4	CCTGCCCAGTGGAATTGTCC	TCCCGGAGATTGCTCAGCTC	STS
83	IBb27os11_5	TGGCTGGAGCAGTGTGTCCT	TCCAAGCTGCCCAATCCAAT	STS
84	IBb27os11_6	TGCCGGTGCTATCCTCATCA	TCGGACAATTGCCTTCTTTGG	STS
85	IBb27os11_7	TCGTCGAACCTTGTCAGCAAA	TCGATGACAGCGGTGAGGTT	STS
86	IBb27os11_8	CCCAGAGATTCATCGCGACA	TTCGCCAGCATGGACAGAAA	STS
87	IBb27os11_9	TGGGATGGATCAATGGAGCA	TCTGGGTCCGCCCACATATT	STS
88	IBb27os11_10	GCGACTTCTGCGTCCCTCAT	GCGAGCGTGGTCTTGCCTAT	STS
89	IBb27os11_11	GGCTGAAGCAGCGGTTATGG	GAACATGGCATGGCGTTTGA	STS
90	IBb27os11_12	ACCGGGTTGGCAGTTTTACG	TGAGGATAGCACCGGCATTG	STS
91	IBb27os11_13	GAACATGGCATGGCGTTTGA	GGCTGAAGCAGCGGTTATGG	STS
92	IBb27os11_14	GAGCGGGCTAGCCTACGTCA	ATCACCATCGCCGGAGTCAT	STS
93	IBb27os11_15	TAGACTCCGGCGGCTACGAG	ACCTCGCCGGTGTAGAGCAC	STS
94	IBb27os11_16	CCCACGAGCTCAGACGAACA	TCGAGCACAGCGACAAGGTC	STS
95	IBb27os11_17	CGCCTTCATCAACGACGAGA	ACCTCGCCAGCAGCTTCATC	STS
96	IBb27os11_18	TCGACCTTGTCGCTGTGCTC	TGAGCTGTCGAATGGCGAAC	STS
97	IBb27Los11_1	ATGACGGTGGGATGGTTTGG	ACTAGTGCGAGCCGGAGACG	STS
98	IBb27Los11_2	GTGGTCGCGGTGCTCCTACT	GATGGGCCTCGGATCAACAC	STS
99	IBb27Los11_3	CAAGGAGCTGGCCAGGAAGA	TTGACCGCTTGCACTTTGGA	STS
100	IBb27Los11_4	AGAGGTCACATCCCCCACCA	AAGGTTTGTGGTGCCGTCGT	STS
101	IBb27Los11_5	CTGAGCAGGGGACTGGCCTA	CCTCCTCCACCATGCTCACC	STS
102	IBb27Los11_6	GAATAGGGCAGGGGGAGGTG	GGCATCGAGAAGGACGAGGA	STS
103	IBb27Los11_7	TCGAGGACTGCATCGACGAC	TCTTGAGCTCCGCGATGTTG	STS
104	IBb27Los11_8	AAGAGGCCACCACGTCAACC	TGGGCCCCTTGACCTCTTTC	STS
105	IBb27Los11_9	TGGATTTGAGCAGCGGGACT	TGGGGTTCTTTCGCAAAACAGT	STS
106	IBb27Los11_10	ATCAGGTTACGCGCCAAGGA	CAGGCGAGGAGGGTCGTAGA	STS
107	IBb27Los11_11	GAAGCCGCACTGAGGCACTT	TGTCGTTGGAAGCCGCAGTA	STS
108	IBb27Los11_12	TCCACCGACCCCTCATCTTC	CAGCAGCGTACGTGGAGGAA	STS
109	IBb27Los11_13	ACCGCCGTTAACGAACGAGA	CGTTCTCGCGGCAACGTA	STS
110	IBb27Los11_14	CGACGTTGCGGATGATCTTG	TGCTCGCAACCTGGGTACAA	STS

## Sheet: S2 Table
S2 Table. GWAS of resistance to BB isolate HB1009 using GAPIT
SNP	Chromosome	Position	P.value	maf	nobs	Rsquare.of.Model.without.SNP	Rsquare.of.Model.with.SNP	FDR_Adjusted_P-values
11992907	11	28739518	5.74e-05	0.394958	119	0.325403	0.430375	0.123953
11943779	11	27560949	6.28e-05	0.298319	119	0.325403	0.428987	0.123953
12707111	12	17066946	0.002538	0.063025	119	0.325403	0.381315	1
2610698	3	5604156	0.004957	0.436975	119	0.325403	0.373578	1
1329596	1	41917762	0.0052	0.348739	119	0.325403	0.373032	1
11964077	11	27998933	0.005279	0.268908	119	0.325403	0.37286	1
1176444	1	36262201	0.005641	0.084034	119	0.325403	0.372106	1
6766627	6	24873284	0.010496	0.07563	119	0.325403	0.365124	1
4198779	4	14609247	0.010872	0.07563	119	0.325403	0.364734	1
11641947	11	21084315	0.011082	0.491597	119	0.325403	0.364522	1
4226350	4	15852364	0.012161	0.058824	119	0.325403	0.363494	1
9361710	9	7338273	0.014975	0.441176	119	0.325403	0.361207	1
id6011429	6	21952273	0.01639	0.109244	119	0.325403	0.360222	1
id8003624	8	11875479	0.018486	0.487395	119	0.325403	0.358915	1
7047111	7	3421625	0.018506	0.042017	119	0.325403	0.358903	1
c6p9862822	6	9862823	0.018618	0.147059	119	0.325403	0.358838	1
10944235	11	4448674	0.019702	0.012605	119	0.325403	0.358226	1
4189894	4	14322646	0.020918	0.063025	119	0.325403	0.357581	1
8003351	8	778672	0.021623	0.495798	119	0.325403	0.357224	1

## Sheet: S3 Table 
S3 Table. Comparision of genotypic and phenotypic data of 20 recombinants within the target region. The green cells are concordance and the violet cells reflect discordance between the phenotypic and genotypic data
Plant no.	Lines	Reaction	1127.5/9:IBb01	1127.5/9:IBb17	C_Bb11g45930_2	I_Bb11.2782(88)_1	I_Bb11.2782(88)_2	IBb27os11_14	I_Bb11.2782(88)_6	IBb27Los11_8	S_BB11.ssr_9	STS11066	STS11065
1	7-16	R	1a	1	1	1	1	1	1	1	1	3	2
2	4-18	S	2	2	2	2	2	2	2	2	2	3	1
3	9-14	S	3	3	3	3	3	2	2	2	2	2	1
4	14-1	S	2	2	2	2	2	2	2	2	2	1	1
5	14-3	S	2	2	2	2	2	2	2	2	2	1	1
6	15-20	S	2	2	2	2	2	2	2	2	2	1	3
7	16-4	S	2	2	2	2	2	2	2	2	2	1	3
8	18-2	S	2	2	2	2	2	2	2	2	2	1	3
9	18-4	S	2	2	2	2	2	2	2	2	2	3	3
10	18-18	S	2	2	2	2	2	2	2	2	2	1	3
11	19-17	S	2	2	2	2	2	2	2	2	2	1	3
12	22-15	S	2	2	2	2	2	2	2	2	2	1	3
13	24-15	S	2	2	2	2	2	2	2	2	2	3	1
14	25-2	S	2	2	2	2	2	2	2	2	2	3	3
15	25-4	S	2	2	2	3	1	3	2	2	3	3	1
16	25-5	S	2	2	2	2	2	2	2	2	2	3	1
17	26-6	S	2	2	2	2	2	2	2	2	2	3	1
18	28-3	S	2	2	2	2	2	2	2	2	2	1	3
19	40-2	S	2	2	2	2	2	2	2	2	2	1	3
20	40-5	S	3	3	3	3	3	2	2	2	2	2	2
Number of recombinat issue			2	2	2	3	3	1	0	0	1	18	19
a1 : P8 allele
2: Ilpum allele
3: Hetero type

## Sheet: S4 Table
S4 Table. List of putative genes in the target region. Gene locus has transcript evidence or protein homologs and predicted locus consisted of predicted genes without any transcript evidence
Predicted locus	Putative function	Transcript evidence
Os11g0687100	von Willebrand factor, type A domain containing protein	AK065631
Os11g0687200	Hypothetical conserved gene	AK107174
Os11g0687500	expressed protein	-
Os11g0687700	expressed protein	-
Os11g0687800	NB-ARC domain containing protein	AK103221
Os11g0687900	Similar to MLA10	AK103659
Os11g0688000	Conserved hypothetical protein	ab initio prediction
Os11g0688200	Conserved hypothetical protein	AK119394

## Sheet: S5 Table
S5 Table. primer sets designed for qRT-PCR
	Locus	Primer name	TM	Forward	Reverse	Product size
1	Os11g0687200	qR-1_43	60	CGCCTTCATCAACGACGAGA	ACCTCGCCAGCAGCTTCATC
2	Os11g0687500	qR-2_50	60	CTGAGCAGGGGACTGGCCTA	CCTCCTCCACCATGCTCACC
3	Os11g0687700	qR-3_51	60	AAGCGGAGAAAGGGGGAGGT	GGCATCGAGAAGGACGAGGA
4	Os11g0687800	qR-4_Y18	60	GCCAACCTTGGTGACCCATT	GGGTGCTTCTGTGACCCCTCT
5	Os11g0687900	qR-5_27	60	CTCCGACGTTGAGGCCATCT	TTGGGCATGAGAGGATGCAA
6	Os11g0688000	qR-6_1	60	AAGAGGCCACCACGTCAACC	TGGGCCCCTTGACCTCTTTC
7	Os11g0688200	qR-7_54	60	TGGATTTGAGCAGCGGGACT	TGGGGTTCTTTCGCAAAACAGT
8	Os11g0688500	qR-8_50	60	TGGCTTCGGATTGGAGAACC	AAGTGCCTCAGTGCGGCTTC
9	Os11g0688666	qR-9_55	60	TCCACCGACCCCTCATCTTC	CAGCAGCGTACGTGGAGGAA
10	House kepping	eEF1-α	60	CCCAGCGTGAGAGAGGTATCA	TCTTGATGAAGTCACGGTGACCA
qRT-PCR condition
1. 50°C 2 min, 1 cycle
2. 95°C 3 min, 1 cycle
3. 95 °C 15 s -> 60 °C 30 s, 40 cycles
Real-time PCR reaction mixture
1. 10ml amfiSure qGreen Q-PCR Master Mix (2x)
2. 1 ml rice leaf cDNA
3. each 1 ml primer forward and reverse (10 pmol/ml each primer)
4. 7 ml H2O
Total 20 ml reactions
After PCR,the PCR specificity is examined by 3% agarose gel using 10 μl from each reaction

## Sheet: S6 Table
S6 Table. Analysis of Ct values of housekeeping gene and target gene expression at 0hr, 1hr, 2hr, 4hr and 24hr after inoculation of bacterial blight for P8 and Ilpum
Variety	Gene name	Bacterial blight inoculation periods
		0hr	1hr	2hr	4hr	24hr
P8	EF-1α	24.69	26.58	26.16	22.41	24.18
	Os11g0687900	18.89	27.95	27.95	27.55	27.81
	Os11g0687800	18.89	31.53	31.19	30.38	30.82
	Os11g0687700	18.89	15.82	16	15.67	15.91
	EF-1α	23.73	25.59	25.24	21.85	23.69
	Os11g0687500	28.85	30.45	30.05	30	29.96
	Os11g0688000	28.85	26.82	27.13	26.77	27.46
	Os11g0688200	28.85	32.64	32.3	32.24	32.59
	EF-1α	24.79	23.66	23.41	22.79	22.8
	Os11g0687200	26.93	32.5	32.33	31.91	31.96
	Os11g0688500	26.93	25.6	25.73	25.93	25.9
	Os11g0688666	26.93	27.59	28.38	28.28	28.2
Ilpum	EF-1α	25.56	25.57	22.75	24.76	26.28
	Os11g0687700	18.13	16.68	14.87	15.89	16.43
	Os11g0688000	18.13	26.62	25.92	27.15	28.7
	Os11g0687800	18.13	30.2	29.1	30.65	30.87
	EF-1α	22.95	21.56	20.9	20.46	20.76
	Os11g0687200	22.88	26.3	25.95	26.3	26.12
	Os11g0688500	22.88	21.06	20.89	20.87	20.59
	Os11g0688666	22.88	26.23	25.91	26.1	25.81
	EF-1α	26.63	23.93	24.5	23.89	24.04
	Os11g0687900	30.03	30.8	30.78	30.87	30.52
	Os11g0687500	30.03	29.64	29.94	29.71	29.93
	Os11g0688200	30.03	28.58	28.97	29.09	28.93

## Sheet: S7 Table
S7 Table. Leaf reaction of four lines to 10 BB isolates at 14 days after inoculation. P8, IRBB4, and 11325 have Xa43, Xa3 Xa4, and Xa40(t) respectively, and Ilpum is used as a susceptible check. Average lesion length was obtained after measuring three leaves.
	P8	IRBB4	11325	Ilpum
HB1009	1.5 ± 0.8	5.1 ± 0.0	1.8 ± 0.5	12.0 ± 2.0
HB1013	2.0 ± 0.0	2.3 ±1.0	1.0 ± 2.2	10.1 ± 3.1
HB1014	0.5 ± 0.0	3.3 ±1.0	4.0 ± 2.2	7.7 ± 3.1
HB1015	2.0 ± 0.7	2.5 ± 2.0	1.3 ± 2.0	8.0 ± 0.8
HB2010	0.5 ± 1.2	5.8 ± 1.0	1.0 ± 0.1	10.0 ± 4.5
HB2024	2.5 ± 2.0	2.5 ± 1.0	3.7 ± 1.5	12.5 ± 5.2
HB2038	3.5 ± 0.2	5.5 ± 0.7	2.0 ± 2.0	12.3 ± 3.2
HB3011	0.7 ± 0.1	6.5 ± 2.5	5.0 ± 1.8	10.3 ± 3.0
HB3034	4.5 ± 1.8	5.0 ±1.5	6.5 ± 0.5	12.3 ± 2.0
HB3055	3.5 ± 1.7	5.0 ± 0.2	4.5 ± 0.7	10.3 ± 3.1
